# Supplementary material
Source: PubMed Central journal article supplement (PMC3529994)

|                 | Subject ID | Race    | Gender | Age at Study Entry (y) | Initial Peanut Reaction           | Other Current Food Allergies | Atopic Comorbidities |
|-----------------|------------|---------|--------|------------------------|-----------------------------------|------------------------------|----------------------|
| <b>Controls</b> | PEC01      | C       | M      | 4                      | unknown                           | E, M, N, F                   | AD, A                |
|                 | PEC02      | C       | M      | 0.75                   | unknown                           | E, M, S                      | AD                   |
|                 | PEC03      | C       | F      | 24                     | anaphylaxis                       | N, S                         | A                    |
|                 | PEC04      | C       | M      | 45                     | anaphylaxis                       | W                            |                      |
|                 | PEC05      | C       | M      | 32                     | anaphylaxis                       |                              |                      |
|                 | PEC06      | C       | F      | 35                     | anaphylaxis                       | E, M, W                      | AD, A                |
| <b>Subjects</b> | PN001      | C       | F      | 5                      | anaphylaxis                       | N                            | A, AD                |
|                 | PN002      | C       | M      | 6                      | anaphylaxis                       |                              | AD, AR               |
|                 | PN003      | C       | M      | 2                      | urticaria                         |                              | A,AR,AD              |
|                 | PN004      | C       | F      | 4                      | urticaria                         | E                            | AD, A                |
|                 | PN005      | C       | M      | 5                      | angioedema                        | N                            | AD, A                |
|                 | PN007      | C       | M      | 5                      | urticaria + angioedema            |                              | A,AR,AD              |
|                 | PN008      | C       | M      | 2                      | urticaria                         | E                            | AD,AR                |
|                 | PN009      | C       | F      | 4                      | anaphylaxis                       |                              | A,AR                 |
|                 | PN011      | C       | M      | 4.5                    | anaphylaxis                       |                              | AD, A, AR            |
|                 | PN012      | C       | F      | 4                      | urticaria                         |                              | A, AR                |
|                 | PN014      | C       | F      | 9                      | urticaria                         |                              | AD, AR               |
|                 | PN015      | C       | F      | 8                      | anaphylaxis                       | N, S                         | A, AR                |
|                 | PN016      | C       | M      | 8                      | anaphylaxis                       | A                            | AD, AR, A            |
|                 | PN018      | C       | F      | 2                      | anaphylaxis                       |                              | A,AR,AD              |
|                 | PN019      | C/Asian | M      | 4                      | urticaria, angioedema, rhinorrhea | E                            | A,AR,AD              |
|                 | PN021      | C       | M      | 5                      | angioedema                        |                              | AD, AR               |
|                 | PN023      | C       | M      | 5                      | urticaria                         |                              | A, AR                |
|                 | PN024      | C       | M      | 6                      | urticaria                         | N                            | A, AD                |
|                 | PN026      | C       | M      | 9                      | urticaria + abdominal pain        | N                            | AD, A, AR            |
| PN027           | C          | M       | 2      | anaphylaxis            |                                   | AD                           |                      |
| PN028           | C          | F       | 8      | anaphylaxis            |                                   | A                            |                      |
| PN029           | C          | M       | 4      | urticaria              | E, M, N                           | AD, A, AR                    |                      |

*C, Caucasian*

*E, egg; M, milk; W, wheat; N, tree nut(s); F, fish; S, shrimp; A, apple*

*AD, atopic dermatitis; A, asthma; AR, allergic rhinitis*

# Figure E1

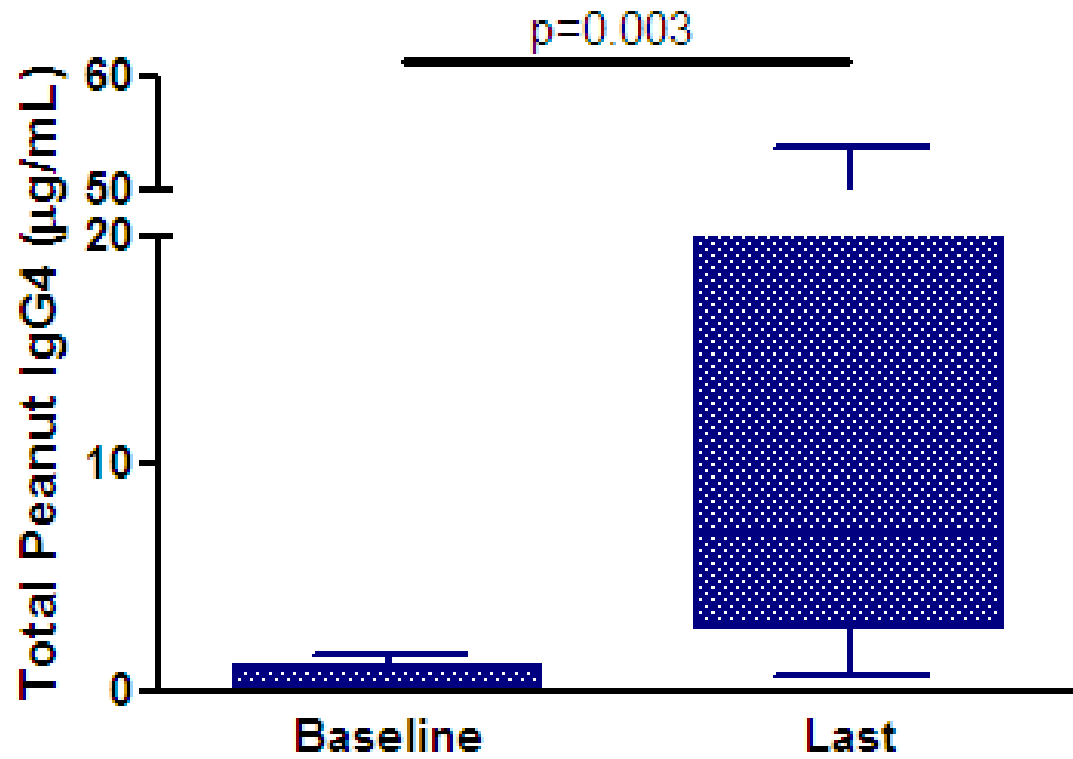

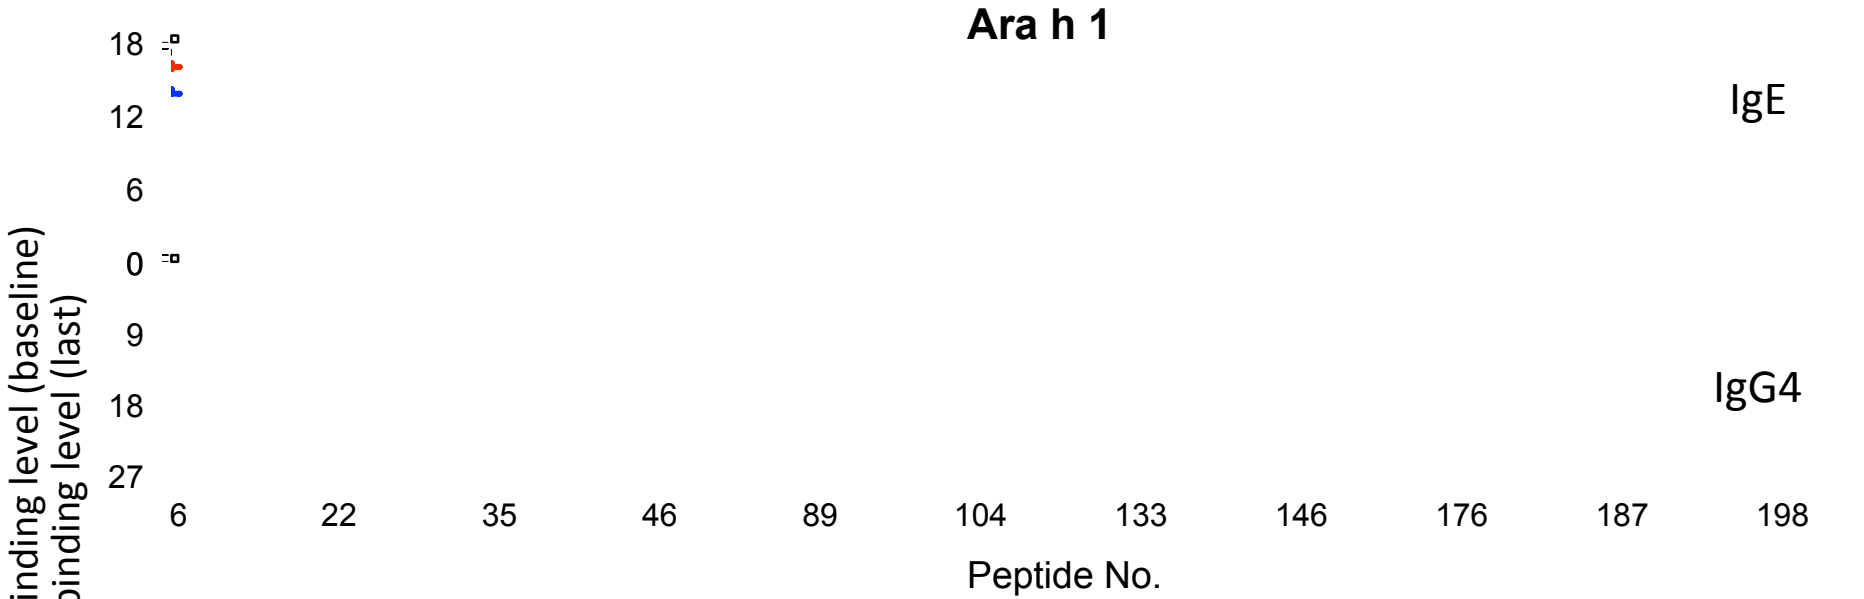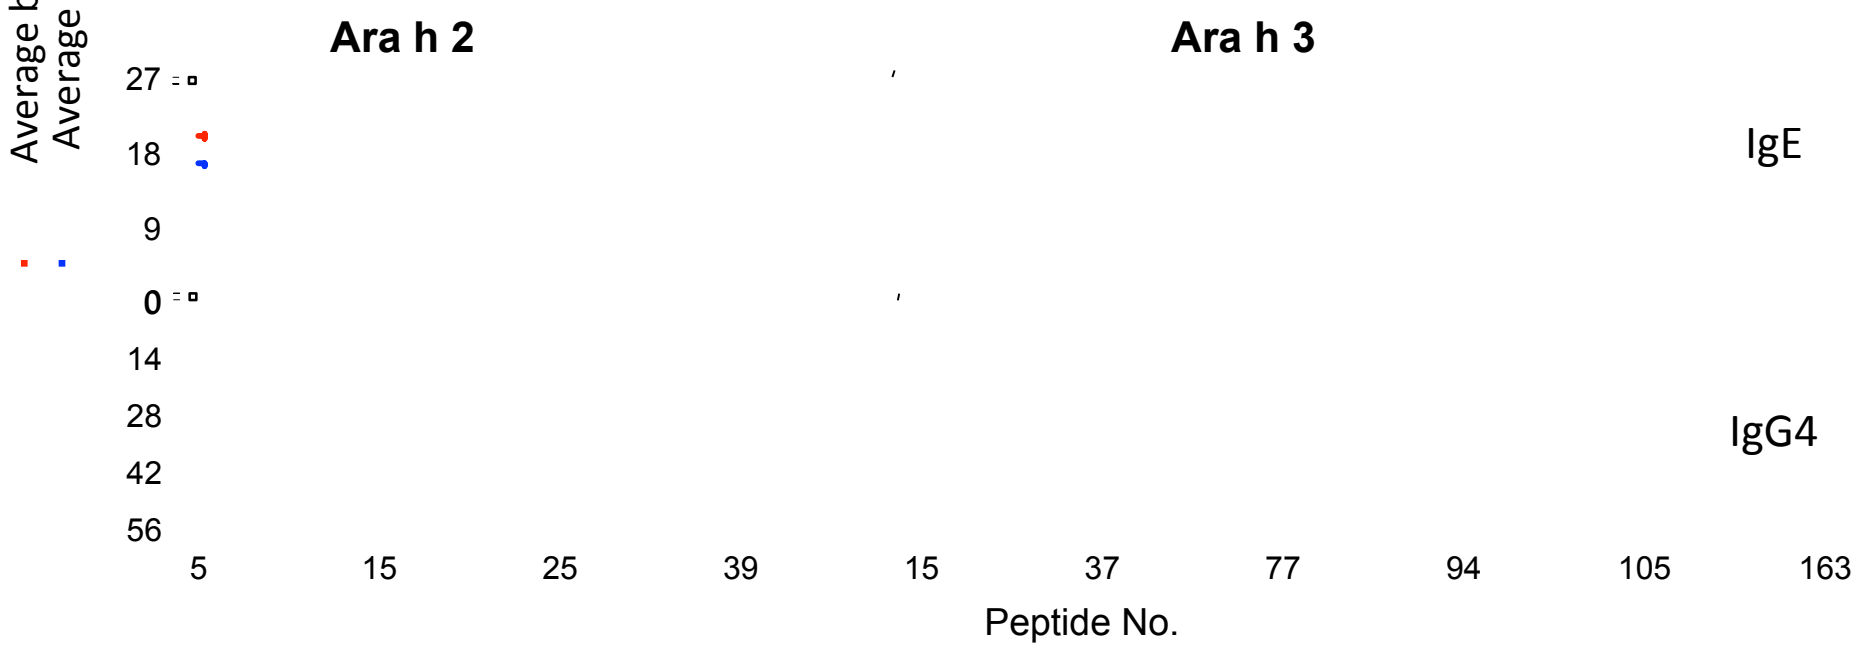

Supplement: NIHMS425196-supplement-01.pdf [file NIHMS425196-supplement-01.pdf]
